# Supplementary material for: DNA Replication Licensing Protein MCM10 Promotes Tumor Progression and Is a Novel Prognostic Biomarker and Potential Therapeutic Target in Breast Cancer
Source: PubMed Central journal article supplement (PMC6162382; doi:10.3390/cancers10090282), 2018-08-22
Supplement: cancers-10-00282-s001.pdf [file cancers-10-00282-s001.pdf]

# Supplementary Materials: DNA Replication Licensing Protein MCM10 Promotes Tumor Progression and Is a Novel Prognostic Biomarker and Potential Therapeutic Target in Breast Cancer

Ravikiran Mahadevappa, Henrique Neves, Shun Ming Yuen<sup>1</sup>, Muhammad Jameel, Yuchen Bai, Hiu-Fung Yuen, Shu-Dong Zhang, Youzhi Zhu, Yao Lin, Hang Fai Kwok

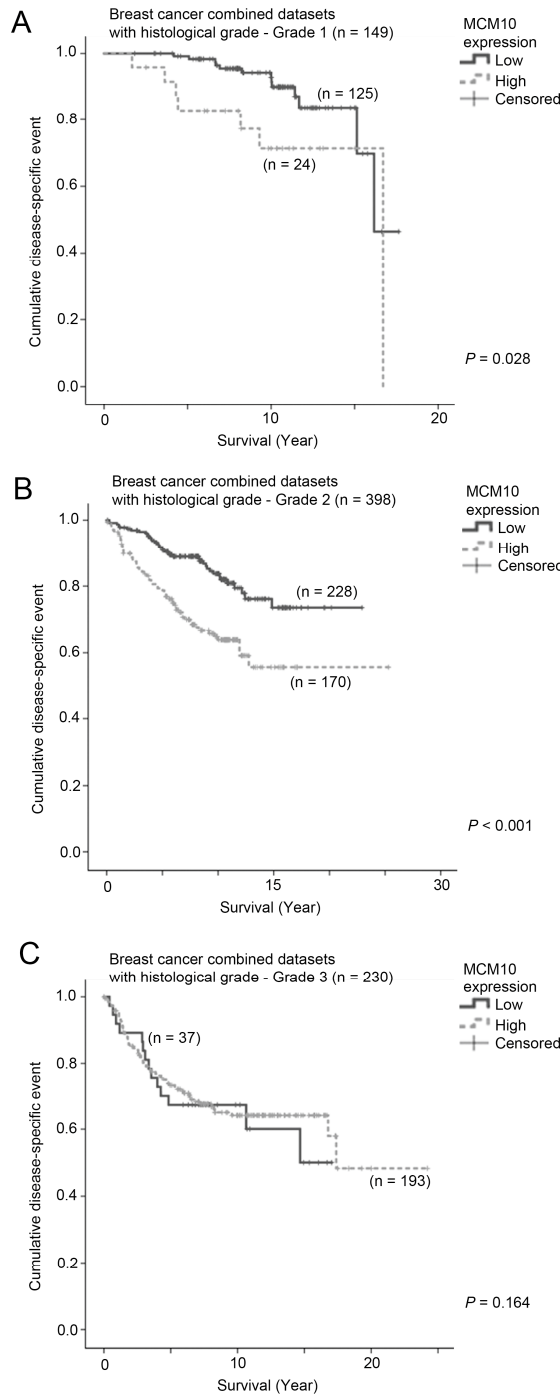

Figure S1. Breast cancer combined datasets with different histological grades.

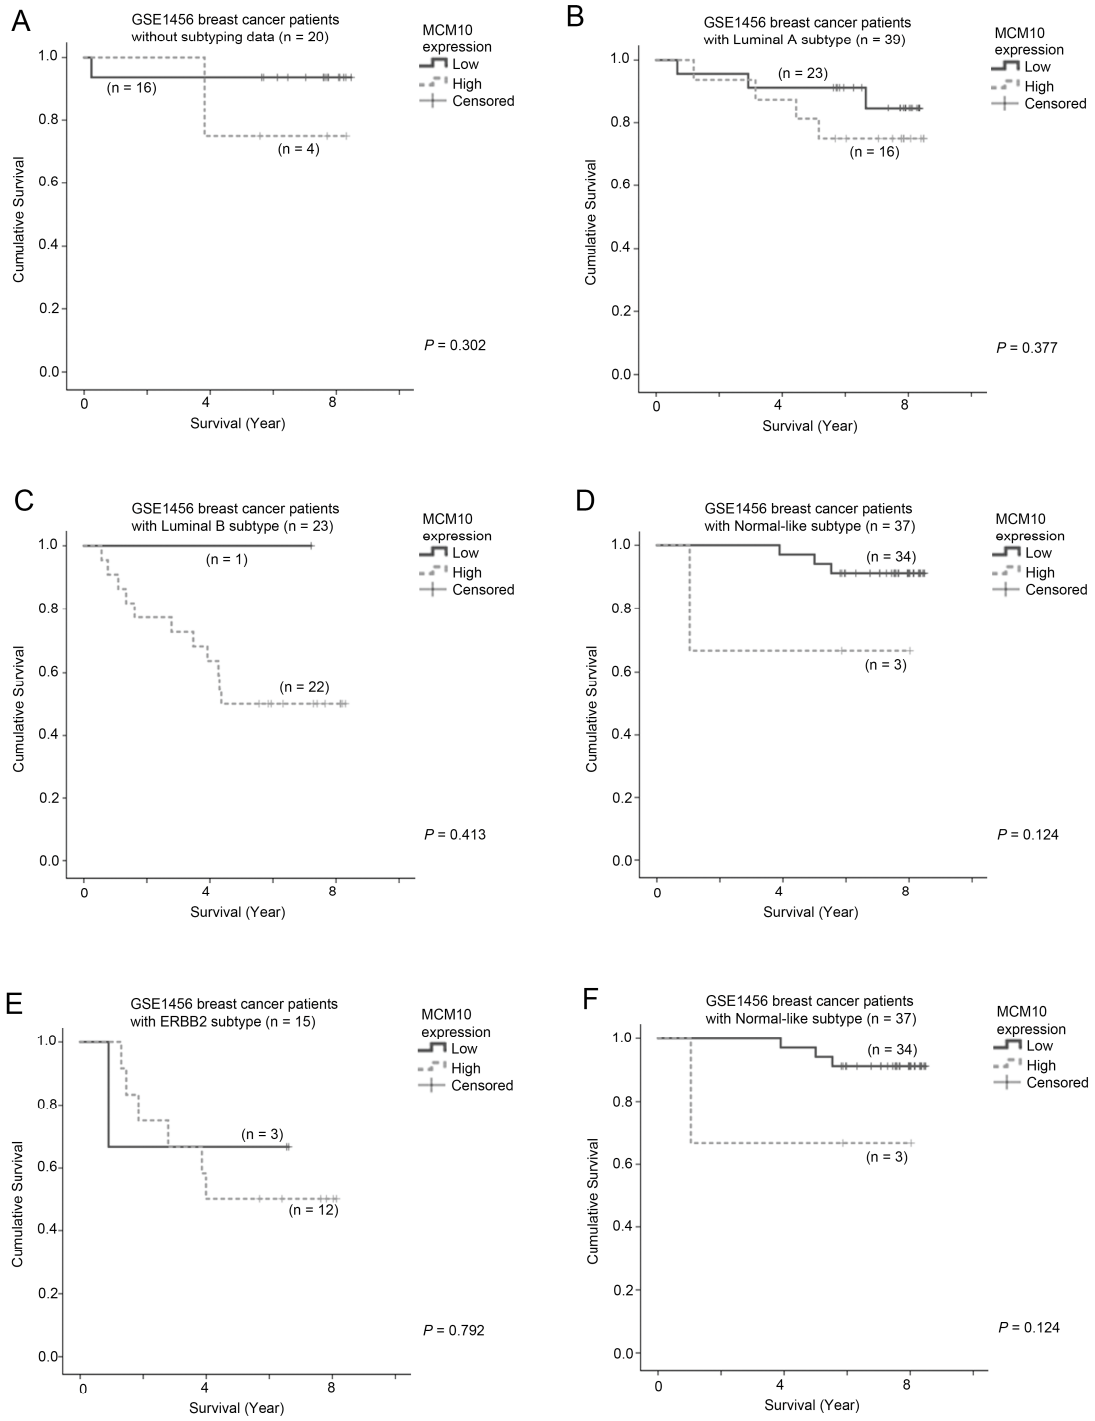

Figure S2. Breast cancer patient different subtypes.

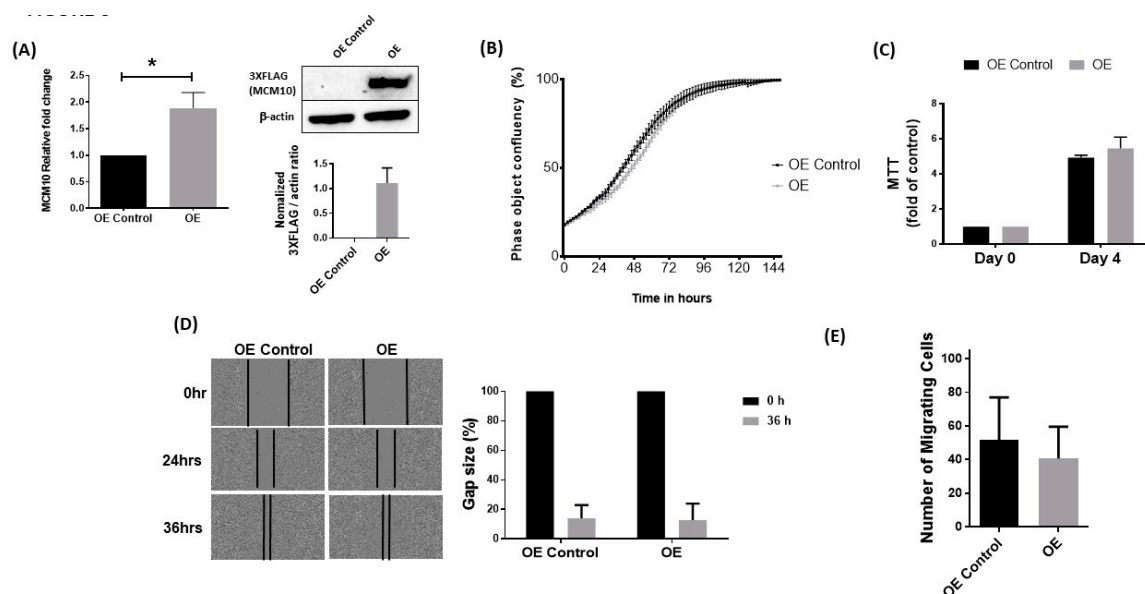

**Figure S3.** Relative expression of MCM10 in stable Overexpression (OE) in MCF 7 cell lines. **(A)** MCM10 expression was significantly increased in MCM10-OE MCF 7 cell lines assessed by qPCR and western blots ( $n = 3$ ,  $* p < 0.05$ ). **(B)** Cell proliferation in MCM10-OE MCF 7 cell lines showed no difference compared to OE control cells monitored for 7 days in Incucyte ZOOM analysis ( $n = 6$ ) **(C)** MTT proliferation assay using stable cells showed no difference in proliferation rate of MCM10-OE MCF7 cells compared to OE control cells ( $n = 3$ ). **(D)** Wound heal assay performed by using MCM10-OE MCF 7 in Incucyte ZOOM showed no difference. Wound heal quantified by relative Gap size using Incucyte ZOOM software ( $n = 6$ ). **(E)** Transwell cell migration assay showed a similar observation with no difference in number of migrating cells in MCM10-OE MCF7 cells ( $n = 3$ ).

**Table S1.** Clinicopathological parameters of patient samples used for qPCR analysis of MCM10.

| NO. | Age | Location | Category  | Tumor size (cm)               | Grade | LND NO. | LNM NO. | Cadherin-E   | P120         | p63              | ER      | PR      | HER2 | ki-67   | CK5/6                | p53    |
|-----|-----|----------|-----------|-------------------------------|-------|---------|---------|--------------|--------------|------------------|---------|---------|------|---------|----------------------|--------|
| 1   | 48  | Right    | IDC       | 2.5 × 2 × 1.2                 | II    | 18      | 8       | +            |              |                  | +, 95%  | +, 90%  | 2+   | (+, 20% | –                    |        |
| 2   | 48  | Right    | LCIS      | 2.5 × 1.5 × 1.5               |       | 15      | 0       | –            | cytoplasm, + | myoepithelium, + | +, 90%  | +, 60%  | 2+   | +, 10%  | myoepithe<br>lium, + |        |
| 3   | 44  | Left     | IDC       |                               | II    | 20      | 0       |              |              |                  | +, 90%  | +, 70%  | 3+   | +, 20%  | –                    |        |
| 4   | 38  | Right    | IDC       | 3.2 × 2.5                     | II    | 16      | 12      | membrane, +  | membrane, +  |                  | +, 90%  | (+, 95% | –    | +, 10%  | –                    |        |
| 5   | 41  | Right    | IDC       | The maximum diameter:<br>2 cm | II    | 19      | 1       | membrane, +  | membrane, +  | –                | +, 90%  | +, 10%  | 2+   | +, 20%  | –                    |        |
| 6   | 36  | Left     | IDC       |                               | II    | 21      | 0       | cytoplasm, + |              | –                | +, 95%  | +, 80%  | 3+   | +, 30%  | –                    |        |
| 7   | 37  | Left     | IDC       |                               | III   | 16      | 0       | membrane, +  | membrane, +  |                  | +, 70%  | +, 50%  | 3+   | +, 30%  |                      |        |
| 8   | 40  | Left     | IDC       |                               | I     | 29      | 0       | membrane, +  | membrane, +  | myoepithelium, – | +, 60%  | +, 80%  | 2+   | +, 30%  |                      | +, <1% |
| 9   | 59  | Left     | IDC       | 4.0 × 3.0 × 3.0               | II    | 23      | 0       | membrane, +  | membrane, +  | –                | +, >95% | +, 20%  | 3+   | +, 30%  |                      | +, <1% |
| 10  | 56  | Right    | IDC       |                               | I     | 11      | 0       | membrane, +  | membrane, +  |                  | +, 100% | +, 90%  | –    | +, 20%  |                      |        |
| 11  | 68  | Left     | IDC       |                               | II    | 16      | 0       | membrane, +  | membrane, +  |                  | +, 80%  | +, 1%   | 1+   | +, 40%  |                      | +, 5%  |
| 12  | 60  | Right    | IDC       | 3.5 × 3 × 2.6                 | III   | 16      | 0       | membrane, +  | Membrane, +  | –                | –       | –       | 1+   | +, 85%  | +                    |        |
| 13  | 33  | Left     | IDC       |                               | II    | 22      | 9       | +            | +            | –                | +, 90%  | +, 20%  | 2+   | +, 8%   | –                    |        |
| 14  | 43  | Left     | IDC       |                               |       | 27      | 27      | membrane, +  | cytoplasm, + | –                | +, 10%  | +, 10%  | 3+   | +, 40%  |                      | +, <1% |
| 15  | 60  | Left     | IDC       |                               | II    | 23      | 1       | +            | membrane, +  | –                | +, 95%  | +, 80%  | 3+   | +, 20%  | –                    |        |
| 16  | 34  | Left     | uncertain |                               | II    | 24      | 22      | membrane, +  | membrane, +  | +                | +, 20%  | +, 5%   | –    | +, 60%  | +                    |        |

Note: IDC, Invasive Ductal Carcinoma; LCIS, lobular carcinoma in situ; LND, lymph node dissection; LNM, lymph node metastasis; +, positive; –, negative.

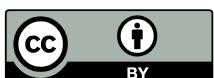

© 2018 by the authors. Licensee MDPI, Basel, Switzerland. This article is an open access article distributed under the terms and conditions of the Creative Commons Attribution (CC BY) license (<http://creativecommons.org/licenses/by/4.0/>).
